# Supplementary material for: Antidiabetic Drug Prescription Pattern in Hospitalized Older Patients with Diabetes
Source: MDPI journal article supplement (doi:10.3390/ijerph20032607), 2023-01-31
Supplement: s1 [file s1]

**Table S1. Cause of hospital admission for 1703 patients with diabetes included in the REPOSI registry**

| <b>Cause of hospital admission</b>                 | <b>N (%)</b>      |
|----------------------------------------------------|-------------------|
| <b>Heart diseases</b>                              |                   |
| Heart failure                                      | <b>178 (10.5)</b> |
| Atrial fibrillation                                | <b>32 (1.9)</b>   |
| <b>Symptoms, signs, and ill-defined conditions</b> |                   |
| Dyspnea                                            | <b>171 (10.0)</b> |
| Syncope                                            | <b>140 (8.2)</b>  |
| Diarrhea, nausea and vomiting                      | <b>23 (1.4)</b>   |
| Abdominal pain                                     | <b>51 (3.0)</b>   |
| <b>Diabetes</b>                                    |                   |
| Diabetes                                           | <b>73 (4.3)</b>   |
| Hypoglycemia                                       | <b>17 (1.0)</b>   |
| <b>Pneumonia</b>                                   |                   |
| Bacterial pneumonia                                | <b>60 (3.5)</b>   |
| Pneumonia (organism unspecified)                   | <b>24 (1.4)</b>   |
| Bronchopneumonia                                   | <b>20 (1.2)</b>   |
| <b>Other Respiratory diseases</b>                  | <b>54 (3.2)</b>   |
| <b>COPD</b>                                        | <b>36 (2.1)</b>   |
| <b>Blood diseases</b>                              |                   |
| Anemia                                             | <b>70 (4.1)</b>   |
| Iron deficiency anemia                             | <b>36 (2.1)</b>   |
| <b>Cerebrovascular diseases</b>                    |                   |
| TIA                                                | <b>23 (1.4)</b>   |
| Cerebral thrombosis                                | <b>22 (1.3)</b>   |
| <b>Other</b>                                       | <b>673 (39.5)</b> |

COPD: Chronic Obstructive Pulmonary Disease; TIA: Transient Ischemic Attack.

ICD-9-CM code for assessing cause of hospital admission: Heart Failure: 428; Atrial fibrillation: 427; Dyspnea: 786; Syncope: 780; Diarrhea, nausea and vomiting: 787; Abdominal pain: 789; Diabetes: 250; Hypoglycemia: 251; Bacterial pneumonia: 482; Pneumonia (organism unspecified): 486; Bronchopneumonia: 485; Other respiratory diseases: 518; COPD: 491; Anemia: 285; Iron deficiency anemia: 280; TIA: 435; Cerebral Thrombosis: 434; Other included specific conditions with a prevalence less than 2%

**Table S2. Prevalence of patients treated or not with different antidiabetic drugs as monotherapy or combination at admission by years**

|                                                                  | <b>2010</b>  | <b>2012</b>  | <b>2014</b>  | <b>2016</b>  | <b>2017</b>  | <b>2018</b>  | <b>2019</b>  |
|------------------------------------------------------------------|--------------|--------------|--------------|--------------|--------------|--------------|--------------|
|                                                                  | <b>N=324</b> | <b>N=336</b> | <b>N=269</b> | <b>N=175</b> | <b>N=224</b> | <b>N=161</b> | <b>N=214</b> |
| Untreated, n (%)                                                 | 46 (14.2)    | 56 (16.7)    | 32 (11.9)    | 22 (12.6)    | 37 (16.5)    | 36 (22.4)    | 41 (19.1)    |
| Insulin monotherapy                                              | 85 (26.2)    | 85 (25.3)    | 85 (31.6)    | 54 (30.9)    | 72 (32.1)    | 40 (24.8)    | 61 (28.5)    |
| Metformin monotherapy                                            | 51 (15.7)    | 58 (17.3)    | 59 (33.7)    | 38 (21.7)    | 41 (18.3)    | 33 (20.5)    | 48 (22.4)    |
| Sulfonylureas monotherapy                                        | 34 (10.5)    | 26 (7.7)     | 17 (9.7)     | 11 (6.3)     | 9 (4.0)      | 8 (5.0)      | 7 (3.3)      |
| Repaglinides monotherapy                                         | 21 (6.5)     | 35 (10.4)    | 12 (4.5)     | 11 (6.3)     | 15 (6.7)     | 7 (4.3)      | 6 (2.8)      |
| Other antidiabetic drugs excl. Insulins monotherapy <sup>1</sup> | 1 (0.3)      | 3 (0.9)      | 2 (0.7)      | 4 (2.3)      | 4 (1.8)      | 3 (1.9)      | 8 (3.7)      |
| Fixed combination of antidiabetic drugs <sup>2</sup>             | 32 (9.9)     | 18 (5.3)     | 11 (4.1)     | 6 (3.4)      | 5 (2.2)      | 5 (3.1)      | 3 (1.4)      |
| Insulins+Other antidiabetic drugs                                | 17 (5.2)     | 12 (3.5)     | 14 (5.2)     | 10 (5.7)     | 11 (4.9)     | 1 (0.6)      | 12 (5.6)     |
| Insulins+Metformin                                               | 10 (3.1)     | 12 (3.6)     | 6 (2.2)      | 7 (4.0)      | 8 (3.6)      | 8 (5.0)      | 13 (6.1)     |
| Metformin+Sulfonylureas                                          | 11 (3.4)     | 15 (4.5)     | 14 (5.2)     | 2 (1.1)      | 7 (3.1)      | 10 (6.2)     | 5 (2.3)      |
| Metformin+Repaglinide                                            | 8 (2.5)      | 7 (2.1)      | 8 (3.0)      | 6 (3.4)      | 5 (2.3)      | 3 (1.9)      | 2 (0.9)      |
| Other combination of antidiabetic drugs excl. Insulins           | 8 (2.5)      | 9 (2.7)      | 9 (3.3)      | 4 (2.3)      | 10 (4.5)     | 7 (4.3)      | 8 (3.7)      |

<sup>1</sup> Includes: Alpha glucosidase inhibitors, Dipeptidyl Peptidase (DPP-4), Sodium-glucose co-transporter 2 (SGLT2) inhibitors, Thiazolidinediones, Glucagon-like peptide-1 (GLP-1) analogues<sup>2</sup> Includes: metformin and sulfonylureas; metformin and sitagliptin; metformin and vildagliptin; phenformin and sulfonylureas; metformin and pioglitazone; glimepiride and pioglitazone

**Table S3. Prevalence of patients treated or not with different antidiabetic drugs as monotherapy or combination at discharge by years**

|                                                                  | <b>2010</b>  | <b>2012</b>  | <b>2014</b>  | <b>2016</b>  | <b>2017</b>  | <b>2018</b>  | <b>2019</b>  |
|------------------------------------------------------------------|--------------|--------------|--------------|--------------|--------------|--------------|--------------|
|                                                                  | <b>N=324</b> | <b>N=336</b> | <b>N=269</b> | <b>N=175</b> | <b>N=224</b> | <b>N=161</b> | <b>N=214</b> |
| Untreated, n (%)                                                 | 46 (14.2)    | 68 (20.2)    | 61 (22.7)    | 52 (29.7)    | 61 (27.2)    | 48 (29.8)    | 58 (27.1)    |
| Insulin monotherapy                                              | 107 (33.0)   | 107 (31.8)   | 99 (36.8)    | 63 (36.0)    | 89 (39.7)    | 52 (32.3)    | 72 (33.6)    |
| Metformin monotherapy                                            | 48 (14.8)    | 49 (14.6)    | 40 (14.9)    | 30 (17.1)    | 29 (12.9)    | 27 (16.8)    | 34 (15.9)    |
| Sulfonylureas monotherapy                                        | 28 (8.6)     | 16 (4.8)     | 9 (3.3)      | 5 (2.9)      | 4 (1.8)      | 4 (2.5)      | 3 (1.4)      |
| Repaglinides monotherapy                                         | 23 (7.1)     | 35 (10.4)    | 18 (6.7)     | 5 (2.9)      | 11 (4.9)     | 7 (4.3)      | 2 (0.9)      |
| Other antidiabetic drugs excl. Insulins monotherapy <sup>1</sup> | 1 (0.3)      | 3 (0.9)      | 3 (1.1)      | 2 (1.1)      | 4 (1.8)      | 3 (1.9)      | 7 (3.3)      |
| Fixed combination of antidiabetic drugs <sup>2</sup>             | 17 (5.2)     | 7 (2.1)      | 6 (2.2)      | 2 (1.1)      | 3 (1.3)      | 2 (1.2)      | 1 (0.5)      |
| Insulins+Other antidiabetic drugs                                | 18 (5.6)     | 13 (3.8)     | 12 (4.5)     | 7 (4.0)      | 5 (2.3)      | 2 (1.2)      | 14 (6.5)     |
| Insulins+Metformin                                               | 14 (4.3)     | 12 (3.6)     | 7 (2.6)      | 5 (2.9)      | 7 (3.1)      | 7 (4.3)      | 11 (5.1)     |
| Metformin+Sulfonylureas                                          | 11 (3.4)     | 9 (2.7)      | 10 (3.7)     | 0            | 4 (1.8)      | 5 (3.2)      | 3 (1.4)      |
| Metformin+Repaglinide                                            | 7 (2.2)      | 10 (3.0)     | 3 (1.1)      | 3 (1.7)      | 2 (0.9)      | 0            | 1 (0.5)      |
| Other combination of antidiabetic drugs excl. Insulins           | 4 (1.3)      | 7 (2.1)      | 1 (0.4)      | 1 (0.6)      | 5 (2.3)      | 4 (2.5)      | 8 (3.8)      |

<sup>1</sup> Includes: Alpha glucosidase inhibitors, Dipeptidyl Peptidase (DPP-4), Sodium-glucose co-transporter 2 (SGLT2) inhibitors, Thiazolidinediones, Glucagon-like peptide-1 (GLP-1) analogues

<sup>2</sup> Includes: metformin and sulfonylureas; metformin and sitagliptin; metformin and vildagliptin; phenformin and sulfonylureas; metformin and pioglitazone; glimepiride and pioglitazone

**Table S4. Prevalence of treated patients with diabetes using or not cardiovascular drugs at admission by years**

| <b>Cardiovascular drugs</b>                              | <b>2010<br/>N=278</b> | <b>2012<br/>N=280</b> | <b>2014<br/>N=237</b> | <b>2016<br/>N=153</b> | <b>2017<br/>N=187</b> | <b>2018<br/>N=125</b> | <b>2019<br/>N=173</b> |
|----------------------------------------------------------|-----------------------|-----------------------|-----------------------|-----------------------|-----------------------|-----------------------|-----------------------|
| Not treated, n (%)                                       | 62 (22.3)             | 50 (17.9)             | 44 (18.6)             | 25 (16.3)             | 23 (12.3)             | 23 (18.4)             | 33 (19.1)             |
| ACE-I/ARBs (C09), n (%)                                  | 45 (16.2)             | 62 (22.1)             | 46 (19.4)             | 22 (14.4)             | 27 (14.4)             | 25 (20.0)             | 35 (20.2)             |
| Lipid-lowering drugs (C10), n (%)                        | 14 (5.0)              | 18 (6.4)              | 8 (3.4)               | 10 (6.5)              | 13 (6.9)              | 6 (4.8)               | 18 (10.4)             |
| Antiplatelet (B01AC), n (%)                              | 18 (6.5)              | 24 (8.6)              | 18 (7.6)              | 12 (7.8)              | 19 (10.2)             | 10 (8.0)              | 10 (5.8)              |
| ACE-I (C09) + Lipid-lowering drugs (C10), n (%)          | 34 (12.2)             | 15 (5.4)              | 25 (10.5)             | 19 (13.9)             | 26 (13.9)             | 20 (16.0)             | 23 (13.3)             |
| ACE-I/ARBs (C09) + Antiplatelet (B01AC), n (%)           | 43 (15.5)             | 44 (15.7)             | 28 (11.8)             | 23 (15.0)             | 21 (11.2)             | 11 (8.8)              | 11 (6.4)              |
| Lipid-lowering drugs (C10) + Antiplatelet (B01AC), n (%) | 14 (5.0)              | 13 (4.4)              | 14 (5.9)              | 19 (12.4)             | 15 (8.0)              | 12 (9.6)              | 16 (9.2)              |
| All three, n (%)                                         | 48 (17.3)             | 54 (19.3)             | 54 (22.8)             | 23 (15.0)             | 43 (23.0)             | 18 (14.4)             | 27 (15.6)             |

**Table S5. Prevalence of treated patients with diabetes using or not cardiovascular drugs at discharge by years**

| <b>Cardiovascular drugs</b>                              | <b>2010<br/>N=278</b> | <b>2012<br/>N=280</b> | <b>2014<br/>N=237</b> | <b>2016<br/>N=153</b> | <b>2017<br/>N=187</b> | <b>2018<br/>N=125</b> | <b>2019<br/>N=173</b> |
|----------------------------------------------------------|-----------------------|-----------------------|-----------------------|-----------------------|-----------------------|-----------------------|-----------------------|
| Not treated, n (%)                                       | 55 (19.8)             | 50 (18.7)             | 39 (18.8)             | 20 (16.3)             | 23 (14.1)             | 24 (21.2)             | 35 (22.4)             |
| ACE-I/ARBs (C09), n (%)                                  | 42 (15.1)             | 51 (19.0)             | 31 (14.9)             | 13 (10.6)             | 24 (14.7)             | 23 (20.3)             | 28 (17.9)             |
| Lipid-lowering drugs (C10), n (%)                        | 14 (5.0)              | 18 (6.7)              | 10 (4.8)              | 11 (8.9)              | 14 (8.6)              | 7 (6.2)               | 14 (9.0)              |
| Antiplatelet (B01AC), n (%)                              | 21 (7.6)              | 24 (9.0)              | 19 (9.1)              | 11 (8.9)              | 11 (6.7)              | 4 (3.5)               | 9 (5.8)               |
| ACE-I (C09) + Lipid-lowering drugs (C10), n (%)          | 29 (10.4)             | 20 (7.5)              | 22 (10.6)             | 15 (12.2)             | 23 (14.1)             | 16 (14.2)             | 23 (14.7)             |
| ACE-I/ARBs (C09) + Antiplatelet (B01AC), n (%)           | 47 (16.9)             | 37 (13.8)             | 26 (12.5)             | 19 (15.5)             | 13 (8.0)              | 10 (8.9)              | 6 (3.8)               |
| Lipid-lowering drugs (C10) + Antiplatelet (B01AC), n (%) | 19 (6.8)              | 11 (4.1)              | 17 (8.2)              | 12 (9.8)              | 10 (6.1)              | 14 (12.4)             | 16 (10.3)             |
| All three, n (%)                                         | 51 (18.4)             | 57 (21.3)             | 44 (21.1)             | 22 (17.9)             | 45 (27.6)             | 15 (13.3)             | 25 (16.0)             |
